# Supplementary material for: Differential Colonization Dynamics of Marine Biofilm-Forming Eukaryotic Microbes on Different Protective Coating Materials
Source: MDPI journal article supplement (doi:10.3390/polym11010161), 2019-01-17
Supplement: s1 [file s1]

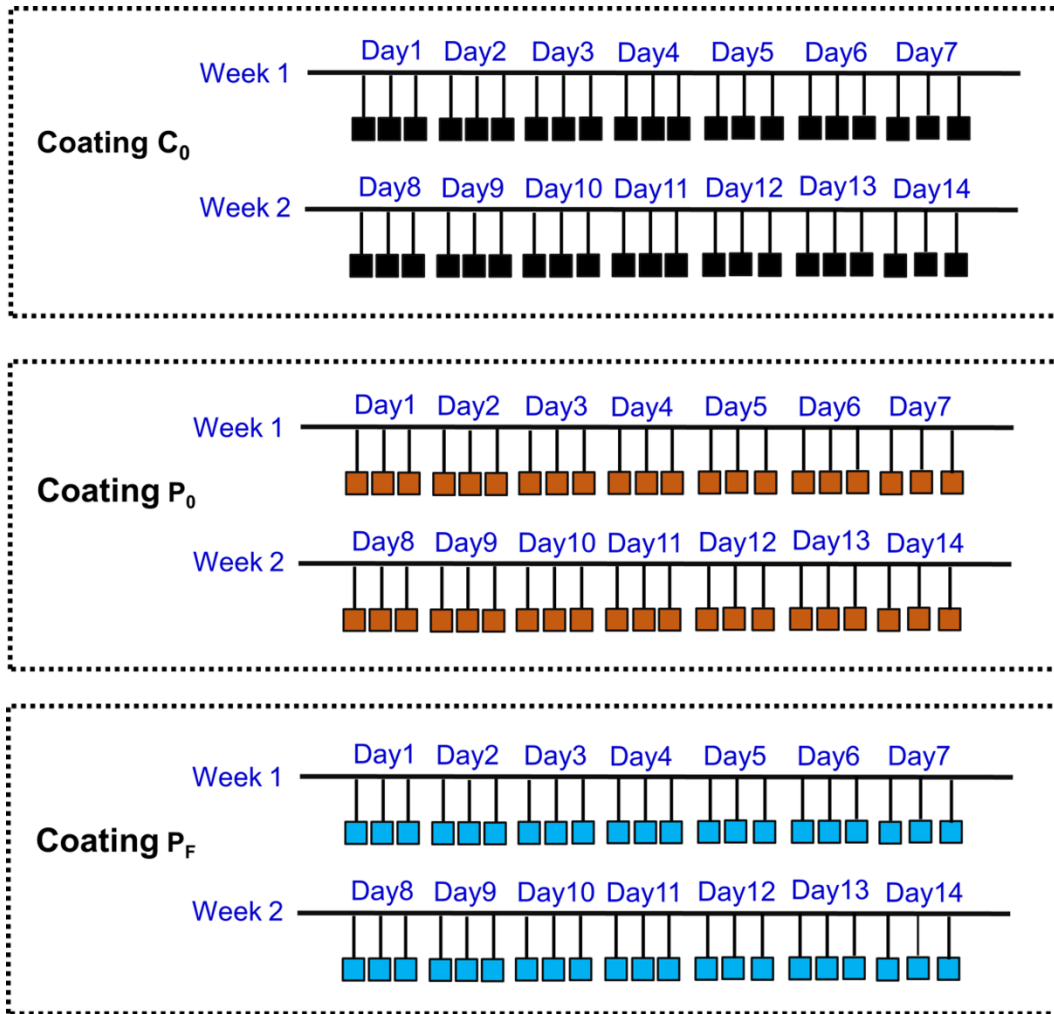

**Figure S1.** Layout of biofilm samples from different protective coatings
